# Supplementary material for: A Biochemometric Approach for the Identification of In Vitro Anti-Inflammatory Constituents in Masterwort
Source: PubMed Central journal article supplement (PMC7277629; doi:10.3390/biom10050679), 2020-04-28
Supplement: biomolecules-10-00679-s001.pdf [file biomolecules-10-00679-s001.pdf]

## Supplementary Information

# A Biochemometric Approach for the Identification of In Vitro Anti-Inflammatory Constituents of Masterwort

Julia Zwirchmayr <sup>1</sup>, Ulrike Grienke <sup>1</sup>, Scarlet Hummelbrunner <sup>1</sup>, Jaqueline Seigner <sup>2</sup>, Rainer de Martin <sup>2</sup>, Verena M. Dirsch <sup>1</sup>, and Judith M. Rollinger <sup>1,\*</sup>

<sup>1</sup> Department of Pharmacognosy, Faculty of Life Sciences, University of Vienna, Althanstraße 14, 1090 Vienna, Austria

<sup>2</sup> Department of Vascular Biology and Thrombosis Research, Medical University of Vienna, Schwarzschanerstraße. 17, 1090 Vienna, Austria

\* Correspondence: judith.rollinger@univie.ac.at; Tel.: +43-1-4277-55255; Fax: +43-1-4277-855255

Received: date; Accepted: date; Published: date

**Table S1**

Table S1 HEMWat system table for HPLCC fractionation with gradient elution

| HEMWat System No. | Solvent ratios |       |      |                  | Used layer of binary solvent system |
|-------------------|----------------|-------|------|------------------|-------------------------------------|
|                   | <i>n</i> -hex  | EtOAc | MeOH | H <sub>2</sub> O |                                     |
| 22                | 3              | 1     | 3    | 1                | upper & lower layer                 |
| 21                | 5              | 2     | 5    | 2                | upper layer                         |
| 20                | 2              | 1     | 2    | 1                | upper layer                         |
| 19                | 3              | 2     | 3    | 2                | upper layer                         |
| 17                | 1              | 1     | 1    | 1                | upper layer                         |
| 15                | 2              | 3     | 2    | 3                | upper layer                         |
| 10                | 1              | 5     | 1    | 5                | upper & lower layer                 |

**Table S2**

Table S2 Pooling of microfractions

| HPLCC Fractions of 1 <sup>st</sup> and 2 <sup>nd</sup> run |         | Fraction Yield [mg] | Microfraction |
|------------------------------------------------------------|---------|---------------------|---------------|
| 1st run                                                    | 2nd run |                     |               |
| 1 – 13                                                     | 1 – 11  | 64.09               | PO01_01       |
| 14 – 20                                                    | 12 – 17 | 10.13               | PO01_02       |
| 21 – 25                                                    | 18 – 23 | 5.23                | PO01_03       |
| 26 – 36                                                    | 24 – 26 | 4.21                | PO01_04       |
| 37 – 41                                                    | 27 – 28 | 9.86                | PO01_05       |
| 42 – 44                                                    | 29 – 31 | 58.44               | PO01_06       |

| 45 – 46                            | 32 – 36   | 38.64               | PO01_07       |
|------------------------------------|-----------|---------------------|---------------|
| HPCCC Fractions of 1st and 2nd run |           | Fraction Yield [mg] | Mircofraction |
| 1st run                            | 2nd run   |                     |               |
| 47 – 49                            | -         | 20.75               | PO01_08       |
| 50 – 52                            | -         | 9.01                | PO01_09       |
| 53 – 55                            | 37 – 55   | 11.34               | PO01_10       |
| 56 – 66                            |           |                     |               |
| 67 – 72                            |           |                     |               |
| 73 – 83                            | 56 – 57   | 8.34                | PO01_11       |
| 84 – 91                            | -         | 9.30                | PO01_12       |
| 92 – 99                            | 58 – 60   | 13.32               | PO01_13       |
| 100 – 105                          | 61 – 68   | 12.59               | PO01_14       |
| 106 – 109                          | 69 – 86   | 7.61                | PO01_15       |
| 110 – 114                          |           |                     |               |
| 115 – 119                          |           |                     |               |
| 120 – 125                          | 87 – 95   | 7.77                | PO01_16       |
| 126 – 131                          | 96 – 100  | 7.57                | PO01_17       |
| 132 – 134                          | 101 – 104 | 6.05                | PO01_18       |
| 135 – 138                          | 105 – 109 | 9.16                | PO01_19       |
| 139 – 142                          | 110 – 114 | 6.14                | PO01_20       |
| 143 – 146                          | 115 – 122 | 5.21                | PO01_21       |
| 147 – 150                          |           |                     |               |
| 151 – 155                          |           |                     |               |
| 156 – 166                          | 134 – 144 | 7.21                | PO01_22       |
| 167 – 172                          | 145 – 155 |                     |               |
| 176 – 178                          | 169 – 179 | 10.69               | PO01_23       |
| 173 – 175                          | 156 – 168 | 13.39               | PO01_24       |
| 179 – 181                          | 180 – 191 | 16.11               | PO01_25       |
| 182 – 184                          | 192 – 200 | 8.35                | PO01_26       |
| 185 – 188                          | 201 – 212 | 4.80                | PO01_27       |
| 189 – 192                          | 213 – 216 | 5.56                | PO01_28       |
| 193 – 197                          | 217 – 222 | 11.37               | PO01_29       |
| 198 – 202                          | 223 – 225 | 4.77                | PO01_30       |
| 203 – 206                          | 226 – 280 | 40.04               | PO01_31       |
| 207 – 212                          | -         |                     |               |
| 213 – 217                          | -         |                     |               |
| 218 – 223                          | -         |                     |               |
| 224 – 228                          | -         |                     |               |
| 229 – 232                          | -         |                     |               |
| 233 – 238                          | -         |                     |               |
| 239 – 285                          | -         |                     |               |

Figure S1

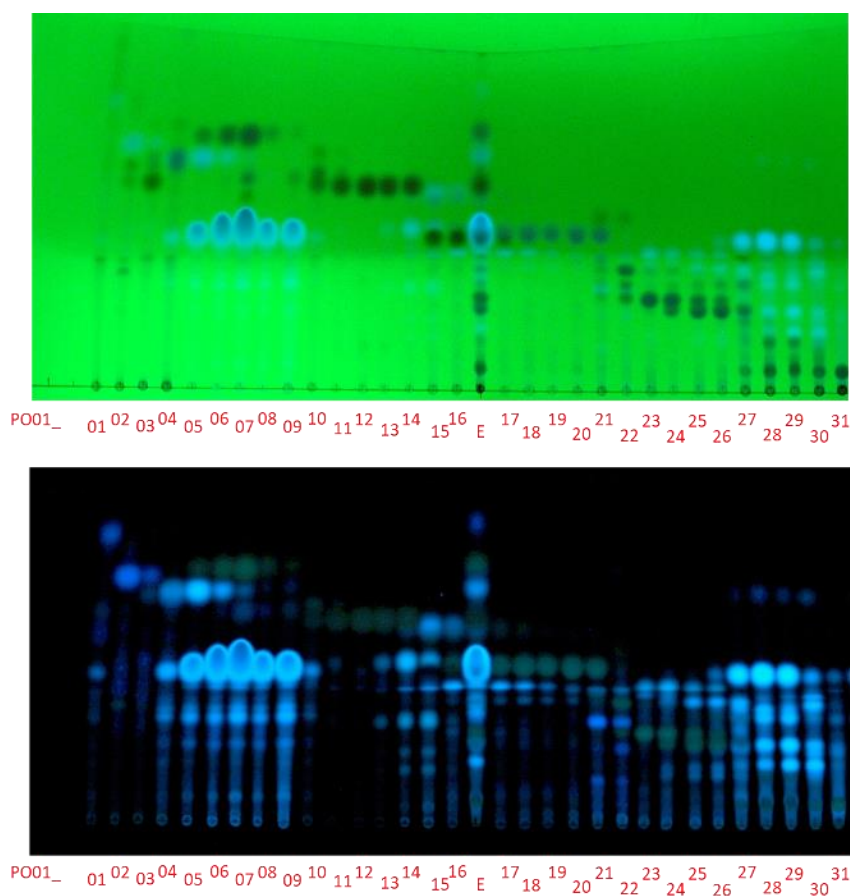

Figure S1 TLC of microfractions PO01\_01-PO01\_31; detection UV254 (top) and UV366 (bottom).

Figure S2

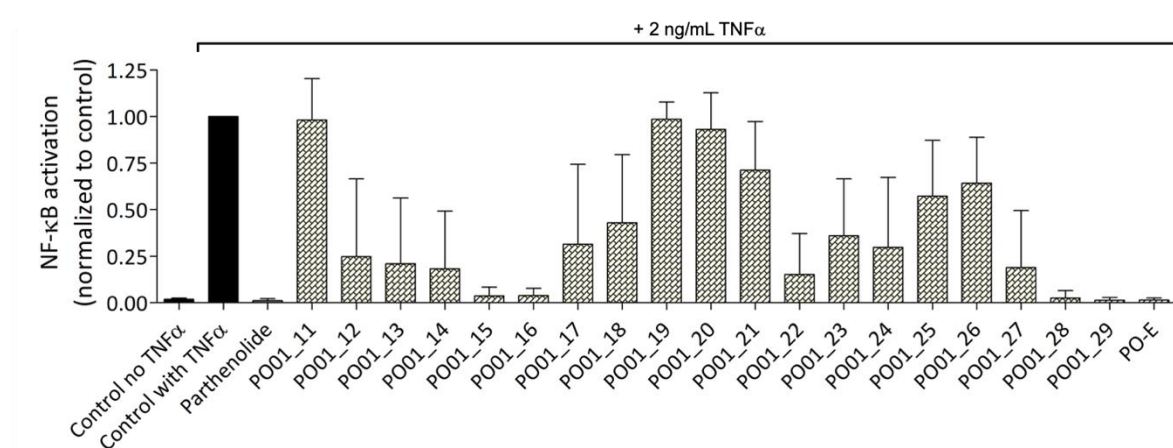

Figure S2. Bioactivity results of PO01\_11-PO01\_29, the crude extract PO-E (all 50  $\mu\text{g/mL}$ ) and the positive control parthenolide (10  $\mu\text{M}$ ) tested in a cell-based in vitro NF- $\kappa\text{B}$ -driven luciferase reporter assay in HEK293-NF $\kappa\text{B}$ -luc cells stimulated with 2 ng/mL TNF $\alpha$  as indicated. The luciferase signal derived from the NF- $\kappa\text{B}$  reporter was normalized to the vehicle control (0.1% DMSO) with TNF $\alpha$ . Bar charts represent (residual) NF- $\kappa\text{B}$  transactivation activity expressed as mean  $\pm$  SD;  $n = 3$ .

Figure S3

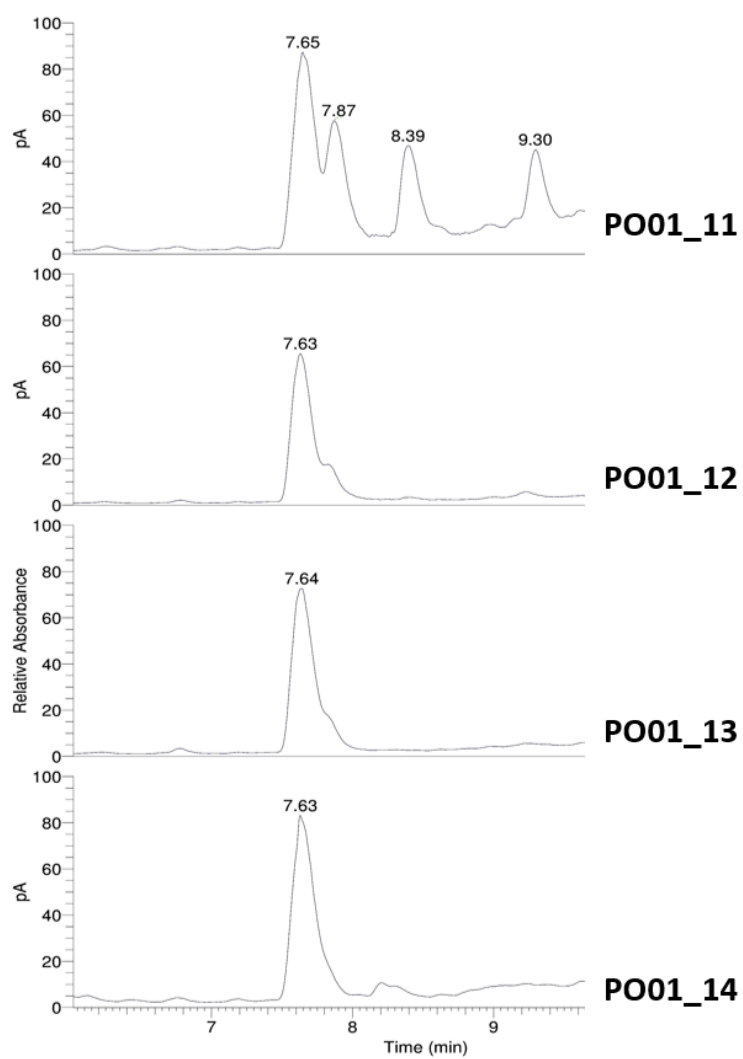

Figure S3. CAD chromatogram of package I (PO01\_11–PO01\_14); tR 6.00 – 9.60 min.

Figure S4

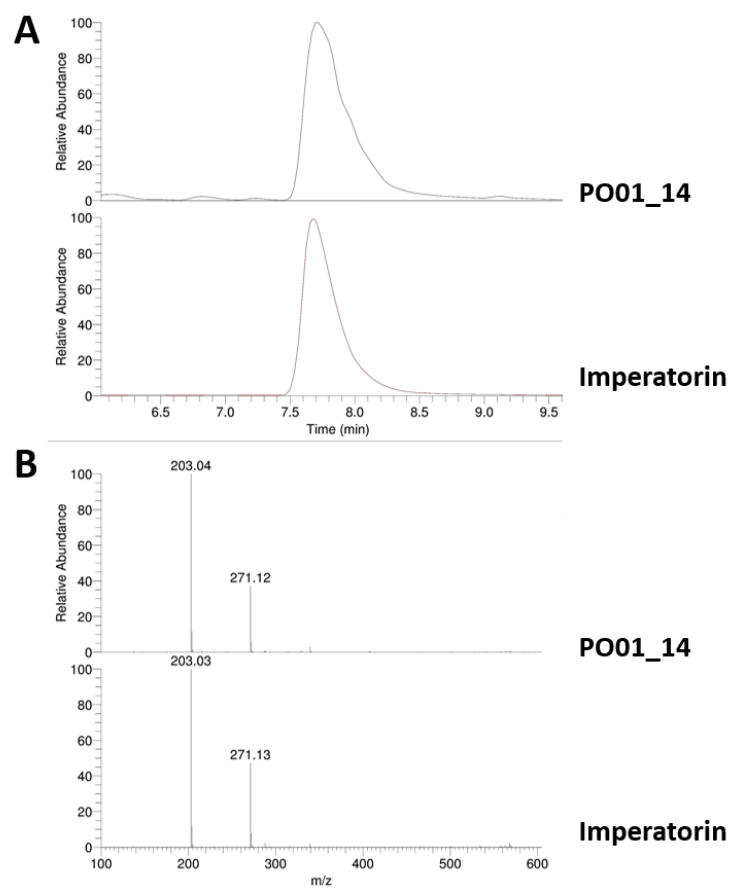

**Figure S4.** LC-MS-CAD analysis of the microfraction PO01\_14 and the pure compound imperatorin; (A) LC chromatogram of PO01\_14 and imperatorin at  $t_R$  7.6 min; (B) Mass spectra of PO01\_14 and imperatorin showing the  $m/z$  value of 271.1 g/mol.

Figure S5

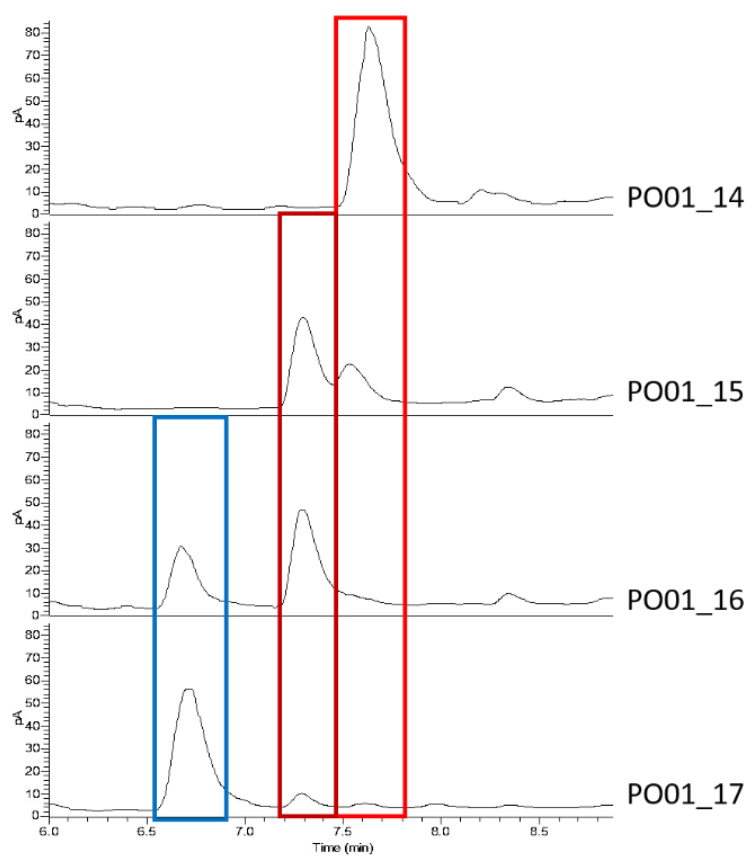

Figure S5. CAD chromatogram of package II (PO01\_14-PO01\_17);  $t_R$  6.0–9.0 min.

Figure S6

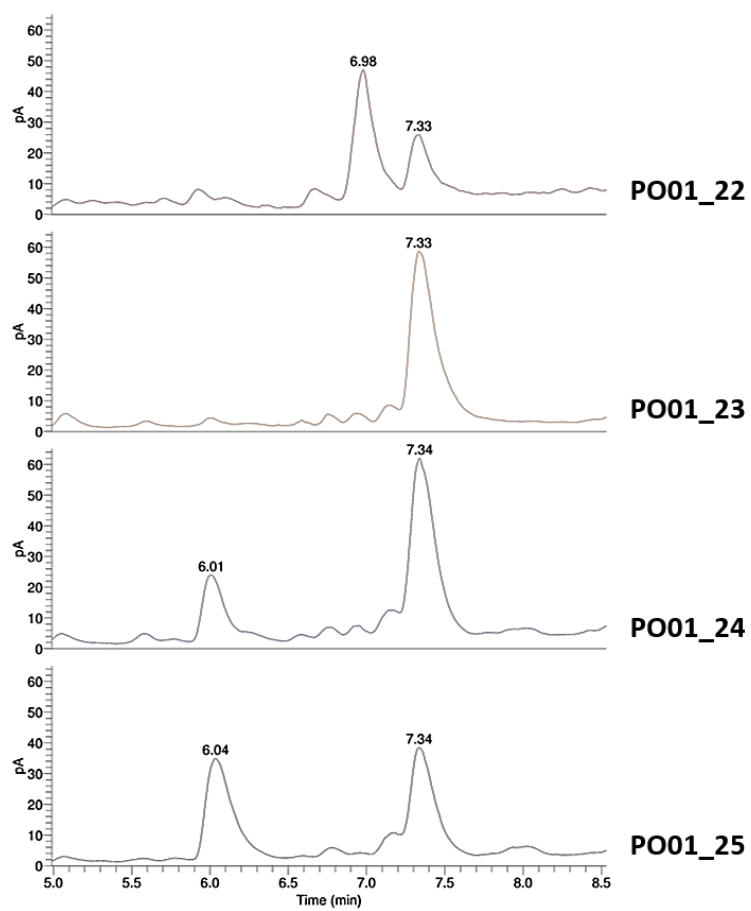Figure S6. CAD chromatogram of package III (PO01\_22-PO01\_25);  $t_R$  5.0–8.5 min.

Figure S7

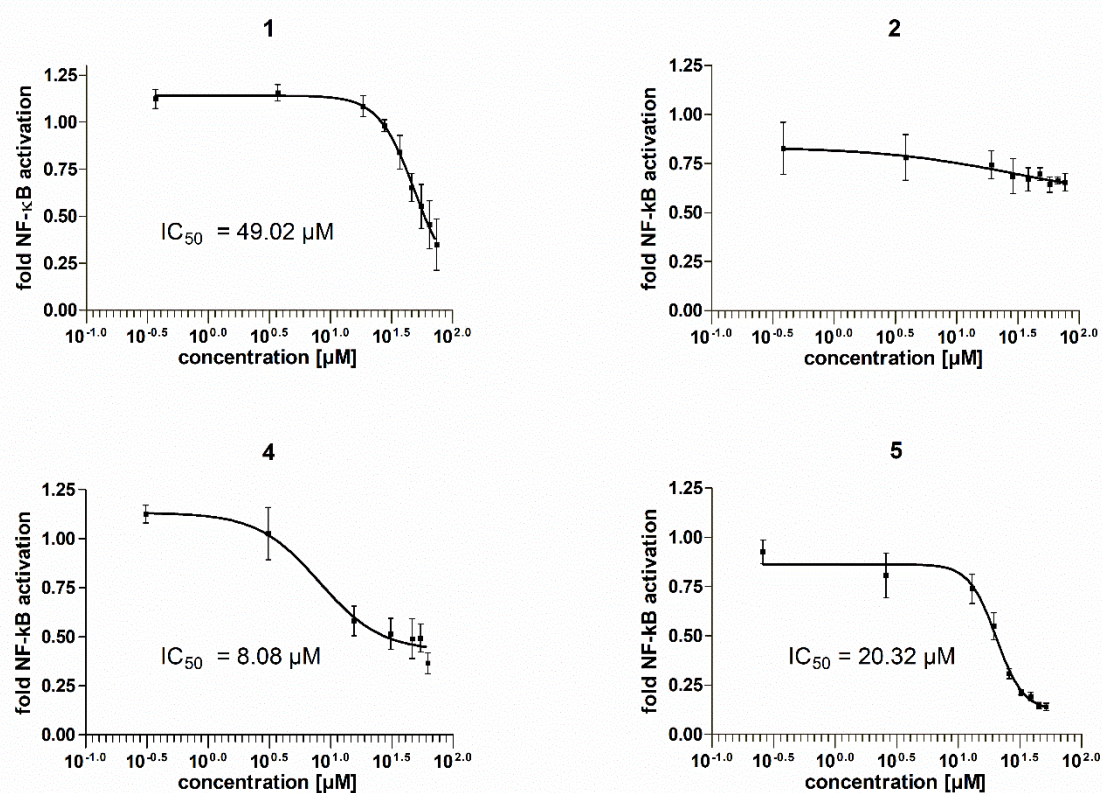

**Figure S7.** Concentration-response curves showing the positively correlated compounds 1, 2, 4, and 5 assayed in a cell-based NF- $\kappa$ B-reporter gene assay at different concentrations. Shown are the residual NF- $\kappa$ B activities in TNF $\alpha$  (2 ng/mL)-activated HEK293-NF- $\kappa$ B-luc cells after treatment with the respective compounds. The luciferase signal derived from the NF- $\kappa$ B reporter was normalized to the CTG-fluorescence and expressed as fold change normalized to the TNF $\alpha$  signal.  $IC_{50}$  values were determined by non-linear regression with the sigmoidal dose response settings (variable slope) using GraphPad Prism 4.03 software.



Figure S8

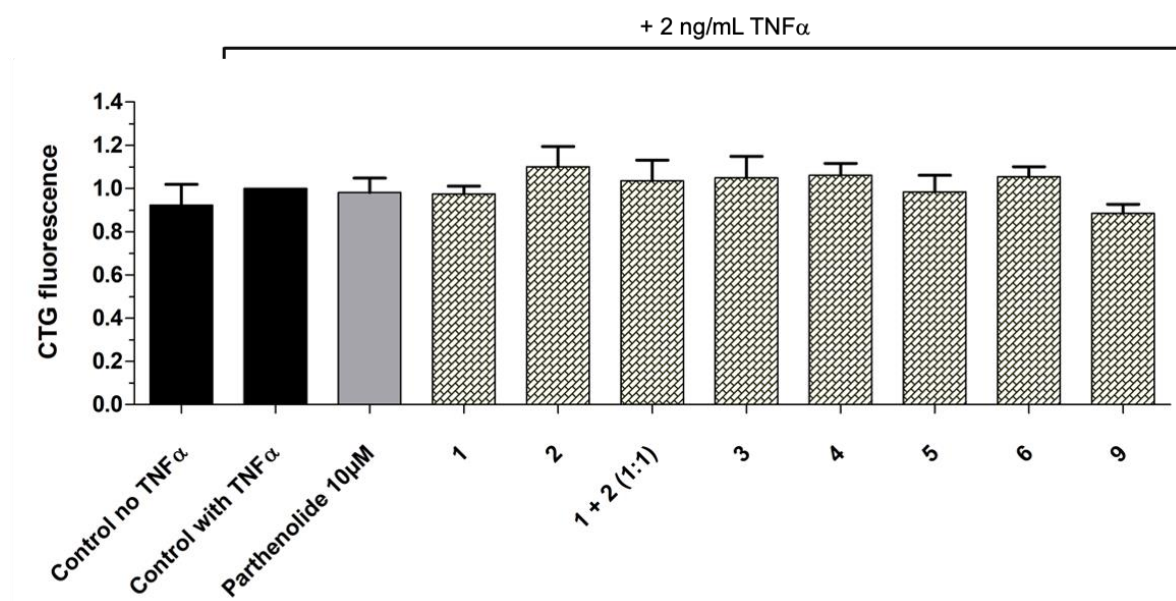

**Figure S8.** CTG fluorescence as a measure for cell viability after treatment with pure compounds 1-6, 9 and a 1:1 mixture of 1 and 2 (all tested at 10 μg/mL) and the positive control parthenolide (10 μM) in TNFα (2 ng/mL)-activated HEK293-NFKB-luc cells; data are normalized to vehicle control (0.1% DMSO) with TNFα. Data represent mean ± SD. *n* = 4

Figure S9

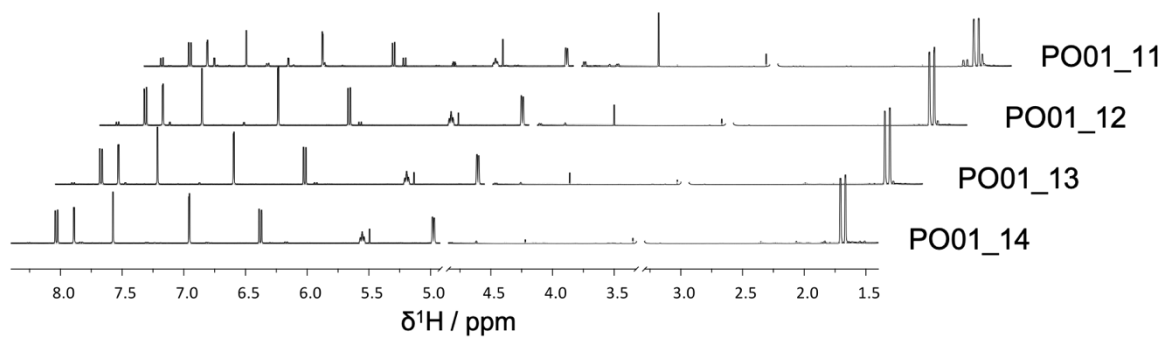

**Figure S9.** <sup>1</sup>H NMR data of package I (PO01\_11-PO01\_14).
